# Supplementary material for: Self-assembled full nanowire P(VDF-TrFE) films with both anisotropic and high bidirectional piezoelectricity
Source: Royal Society of Chemistry journal article supplement (doi:10.1039/c9nr05427h), 2019-01-01
Supplement: c9nr05427h1.pdf [file c9nr05427h1.pdf]

## Supplementary Information

Jing Yu,<sup>a</sup> Kai Cai,<sup>\*b</sup> Li Jin,<sup>c</sup> Hong-Long Ning,<sup>d</sup> Ping-Ye Deng,<sup>b</sup> Jing-Tao Ma<sup>e</sup> and Dong Guo<sup>\*a</sup>

<sup>a</sup> School of Materials Science & Engineering, Beihang University, Beijing 100191, China

<sup>b</sup> Beijing Center for Physical and Chemical Analysis, Beijing 100089, China

<sup>c</sup> Electronic Materials Research Laboratory, Key Laboratory of the Ministry of Education & International Center for Dielectric Research, School of Electronic and Information Engineering, Xi'an Jiaotong University, Xi'an 710049, China

<sup>d</sup> State Key Laboratory of Luminescent Materials and Devices, South China University of Technology, Guangzhou 510640, China

<sup>e</sup> State Key Laboratory of New Ceramics and Fine Processing, Tsinghua University, Beijing 100086, China

### Corresponding author:

\*Kai Cai: caikai@tsinghua.org.cn

\*Dong Guo: dong.guo@buaa.edu.cn

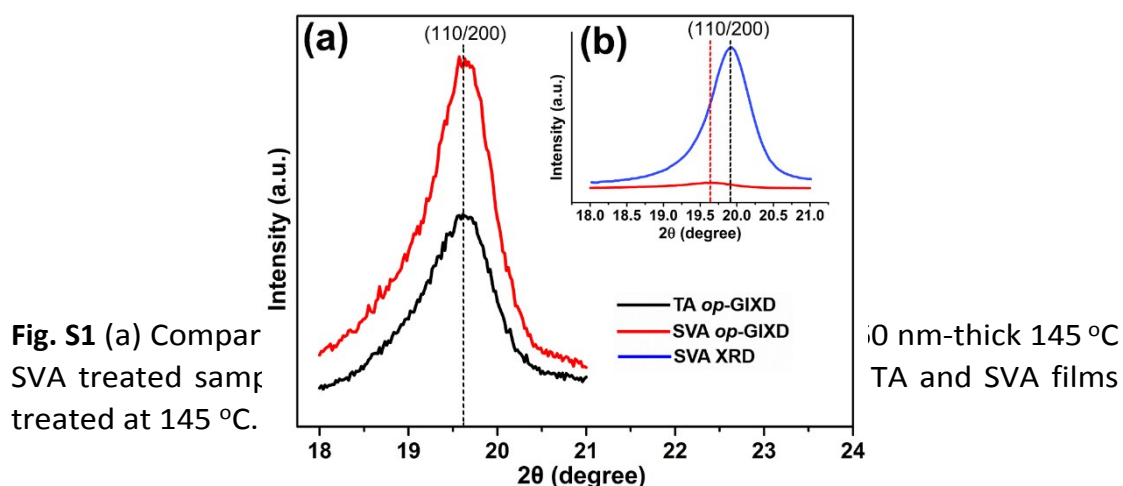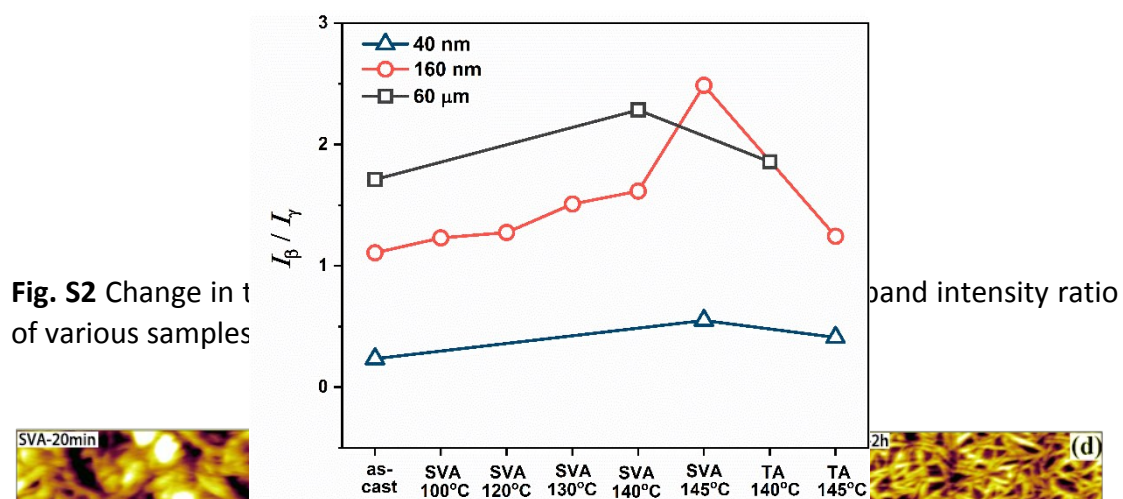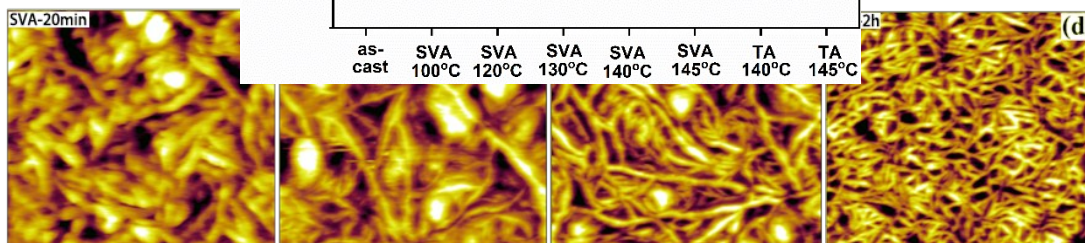

**Fig. S3** AFM morphology images of 160 nm-thick films. (a), (b), (c), (d) and (e) are images of the SVA films annealed at 140 °C for increasing period of 20 min, 1 h, 1.5 h, 2 h and 3 h, respectively. (f), (g) and (h) are images of the TA films annealed at 140 °C for increasing period of 1 h, 2 h and 3 h, respectively.

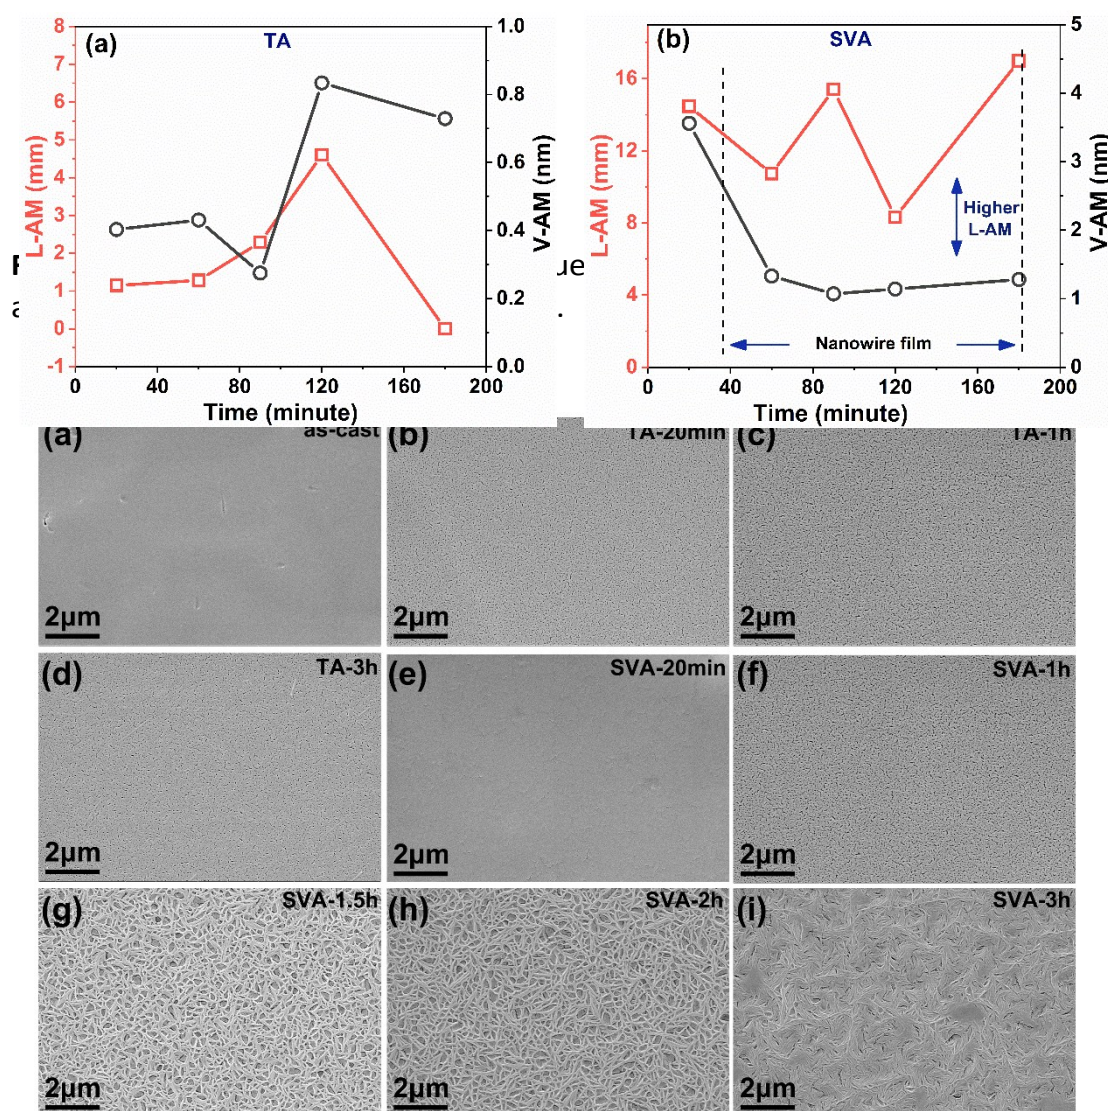

**Fig. S5** larger area SEM images of 160nm-thick films with a smaller magnification. (a) The as-cast film. (b), (c) and (d) are the images of TA films annealed at 140 °C for 20 min, 1 h and 3 h, respectively. (d), (f), (g), (h) and (i)

are the images of SVA films annealed at 140 °C for 20 min, 1 h, 1.5 h, 2 h and 3 h, respectively.

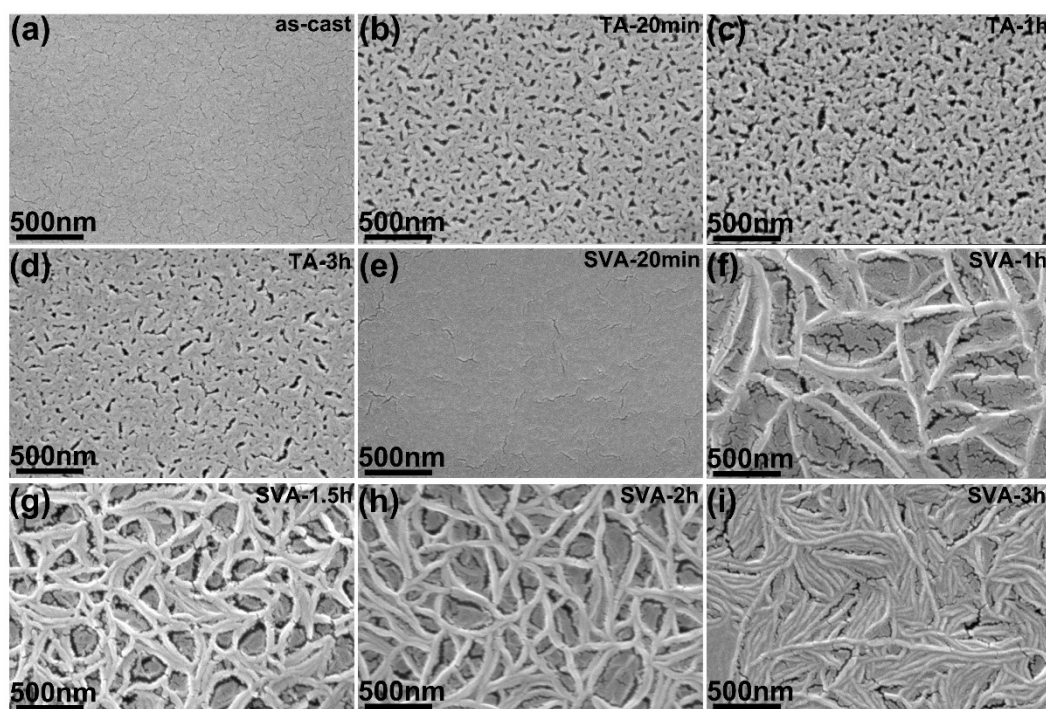

**Fig. S6** SEM photographs of 160nm-thick films with a larger magnification. (a) The as-cast film. (b), (c) and (d) are the images of TA films annealed at 140 °C for 20 min, 1 h and 3 h, respectively. (d), (f), (g), (h) and (i) are the images of SVA films annealed at 140 °C for 20 min, 1 h, 1.5 h, 2 h and 3 h, respectively.
